# Supplementary material
Source: PubMed Central journal article supplement (PMC5546949)
Supplement: NIHMS882901-supplement-1.pdf [file NIHMS882901-supplement-1.pdf]

## **Carbonetti, et al., Supplementary Materials**

### Contents:

Supplementary Table S1: 5' RACE and PCR primer sequences

Supplementary Table S2: Small scale recombinant antibody purification yields

Supplementary Table S3: Binding affinities of AKBR mAbs

Supplementary Figure S1: RTPCR amplification of anti-PfTRAP heavy and light chains

Supplementary Figure S2: Comparison of mAb binding by direct and capture ELISA.

**Supplementary Table S1. 5'RACE and PCR primer sequences**

| <b>PRIMER</b>             | <b>SEQUENCE</b>                                       |
|---------------------------|-------------------------------------------------------|
| <b>Mm IgG CH1 R</b>       | GTCTCGTGGGCTCGGAGATGTGTATAAGAGACAGCAGGGGCCAGTGGATAGAC |
| <b>Mm IgG</b>             | GGGAAGTAGCCCTTGACCAGGC                                |
| <b>Mm IgK CH1 R</b>       | GTCTCGTGGGCTCGGAGATGTGTATAAGAGACAGGGATACAGTTGGTGCAGC  |
| <b>Mm IgK</b>             | CCAGATGTAACTGCTCACTGG                                 |
| <b>Mm IgL</b>             | CCTGGGTAGAAATCAGTGATCG                                |
| <b>Mm IgL CH R</b>        | CAGGGTGA CTGATGGCG                                    |
| <b>SMARTer IIa</b>        | TCGTCGGCAGCGTCAGATGTGTATAAGAGACAGAAGCAGTGGTATCAACGC   |
| <b>SMARTer step-out</b>   | GACAAGCAGTGGTATCAACGCAG                               |
| <b>Gibson SMARTer fwd</b> | ACCCTTGGTACCGCGGCCAAGCAGTGGTATCAACGC                  |
| <b>Gibson IgG1 rev</b>    | TTTGGGCGGCGGAGCCAGGGGCCAGTGGATAGA                     |
| <b>Gibson IgK rev</b>     | GGAGCTAGGGGGGAAGATGGATACAGTTGGTGCAGC                  |

**Supplementary Table S2 - Small-scale recombinant antibody purification yields**

| <b>WELL NUMBER</b> | <b>AKBR</b> | <b>YIELD (<math>\mu\text{g}</math>)<br/>from a 10-mL culture</b> |
|--------------------|-------------|------------------------------------------------------------------|
| 1C7                | 1           | 216                                                              |
| 3B1                | 2           | 26.4                                                             |
| 3F1                | 3           | 79.3                                                             |
| 5C1                | 4           | 158.4                                                            |
| 5D8                | 5           | 35.2                                                             |
| 4A8                | 6           | 19.8                                                             |

Supplementary Table S3. Binding affinities of AKBR mAbs

| <b>AKBR</b> | <b><math>K_D</math> (M)</b> | <b><math>k_{on}</math> (1/Ms)</b> | <b><math>k_{on}</math> (Error)</b> | <b><math>k_{dis}</math> (1/s)</b> | <b><math>k_{dis}</math> (Error)</b> |
|-------------|-----------------------------|-----------------------------------|------------------------------------|-----------------------------------|-------------------------------------|
| 1           | 1.40E-07                    | 4.22E+04                          | 4.89E+03                           | 5.92E-03                          | 2.54E-04                            |
| 2           | 2.64E-08                    | 7.91E+04                          | 2.07E+03                           | 2.09E-03                          | 3.47E-05                            |
| 3           | 8.07E-08                    | 5.23E+05                          | 5.99E+04                           | 4.23E-02                          | 1.31E-03                            |
| 4           | 9.72E-09                    | 1.29E+05                          | 4.24E+03                           | 1.26E-03                          | 3.70E-05                            |
| 5           | 1.78E-08                    | 3.53E+05                          | 2.79E+04                           | 6.30E-03                          | 1.44E-04                            |
| 6           | 9.73E-09                    | 7.23E+04                          | 3.02E+03                           | 7.03E-04                          | 4.50E-05                            |

**Supplementary Figure S1: RTPCR amplification of anti-PfTRAP heavy and light chains**

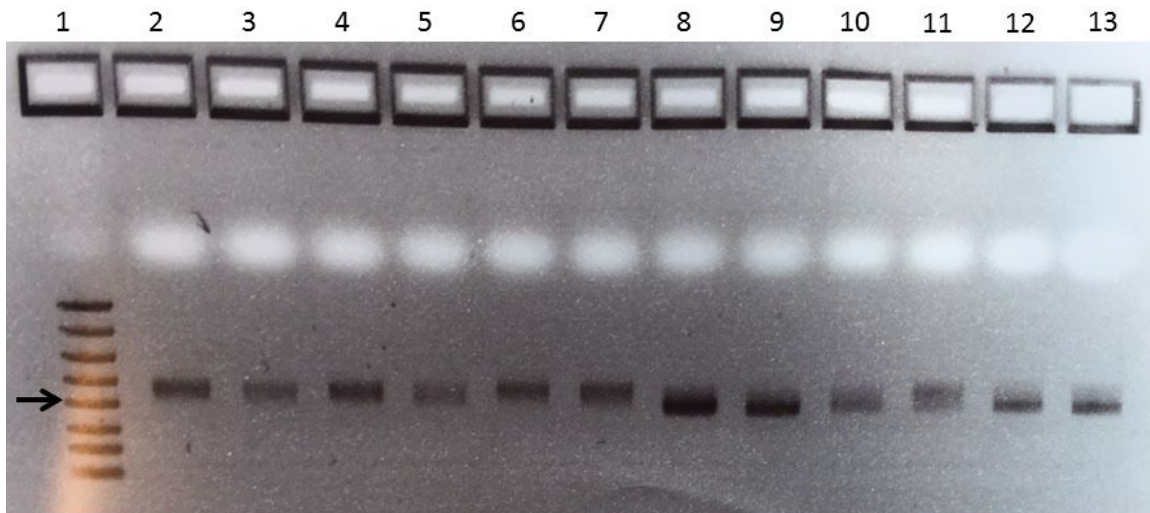

Supplementary Figure S2. Gel-purified anti-PfTRAP amplicons. Lane 1), 100 bp - 4 kb DNA marker (Lonza, Walkersville, MD) lanes 2-7) AKBR-1-6 IgG heavy chain, lanes 8-13) AKBR1-6 IgK light chain. Arrow indicates 500bp on the DNA ladder.

## Supplementary Figure S2: Comparison of direct and streptavidin capture ELISAs.

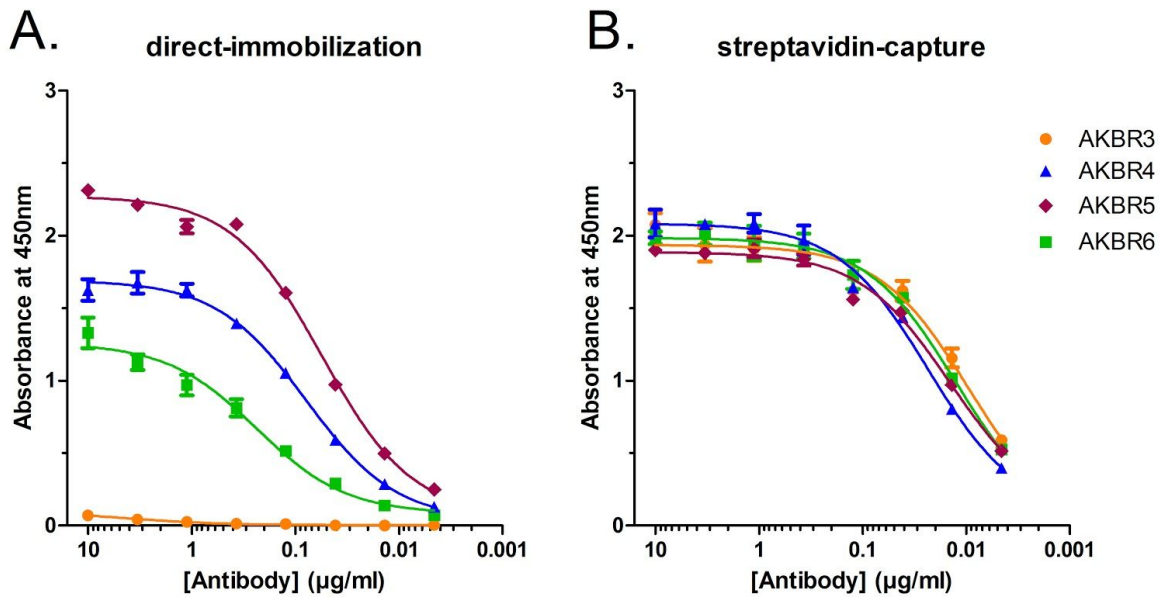

Supplementary Figure S3. PfTRAP was either directly immobilized on ELISA plates (A) or using the pre-immobilized streptavidin (B). For direct mobilization, PfTRAP was adsorbed to Immulon 2HB ELISA plates in 0.1M NaHCO<sub>3</sub> (pH 9.4) overnight at room temperature and then washed with PBS (pH 7.4), 0.02% Tween. The subsequent blocking, wash, primary sample application, secondary antibody steps were carried out as described in the materials and methods. Capture ELISAs were carried as described in the materials and methods.
